# Supplementary material for: Comparison of the Therapeutic Effect of Treatment with Antibiotics or Nutraceuticals on Clinical Activity and the Fecal Microbiome of Dogs with Acute Diarrhea
Source: MDPI journal article supplement (doi:10.3390/ani11061484), 2021-05-21
Supplement: s1 [file s1]

# Comparison of the therapeutic effect of treatment with antibiotics or nutraceuticals on clinical activity and the fecal microbiome of dogs with acute diarrhea

Giulia Pignataro<sup>1\*</sup>, Roberta Di Prinzio<sup>1</sup>, Paolo E. Crisi<sup>1\*</sup>, Benedetta Belà<sup>1</sup>, Isa Fusaro<sup>1</sup>, Carlo Trevisan<sup>2</sup>, Luigi De Acetis<sup>3</sup> and Alessandro Gramenzi<sup>1</sup>

<sup>1</sup> Faculty of Veterinary Medicine, University of Teramo, Strada Provinciale 18, 64100 (TE), Italy;

<sup>2</sup> Veterinary practice, "Ambulatorio Veterinario Dr. Carlo Trevisan", Guardiareale, Via Occidentale 91, 66016 (CH), Italy;

<sup>3</sup> Veterinary practice, "Ambulatorio Veterinario Dr. Luigi De Acetis", Caramanico Terme, (PE), Via Santa Croce, 65023, Italy;

\* Correspondence: gpignataro@unite.it (G.P.); pccrisi@unite.it (P.E.C.)

**Supplementary Table S1.** Composition of dry food Royal Canin Gastrointestinal®.

| Composition                |       |          |
|----------------------------|-------|----------|
| Rice                       |       |          |
| Dehydrated poultry protein |       |          |
| Maize                      |       |          |
| Animal fats                |       |          |
| Hydrolyzed animal proteins |       |          |
| Egg powder                 |       |          |
| Yeasts products            |       |          |
| Beet pulp                  |       |          |
| Soya oil                   |       |          |
| Fish oil                   |       |          |
| Vegetables fibers          |       |          |
| Minerals                   |       |          |
| Psyllium                   |       |          |
| Husk and seeds             |       |          |
| Hydrolyzed yeasts (0.2%)   |       |          |
| Marigold extract           |       |          |
| FOS (0.5%)                 |       |          |
| Nutritional additives      | Unit  | Quantity |
| Vitamin A                  | IU/kg | 16500    |
| Vitamin D3                 | IU/kg | 1000     |
| Iron                       | mg/kg | 41       |
| Iodine                     | mg/kg | 4.1      |
| Copper                     | mg/kg | 12       |
| Manganese                  | mg/kg | 53       |
| Zinc                       | mg/kg | 129      |
| Selenium                   | mg/kg | 0.07     |
| Analytical constituents    | Unit  | Quantity |
| Protein                    | %     | 25.0     |
| Fat                        | %     | 20.0     |
| Crude ash                  | %     | 6.6      |
| Crude fibers               | %     | 1.9      |
| EPA/DHA                    | %     | 0.31     |
| Omega-3 fatty acids        | %     | 0.85     |
| Omega-6 fatty acids        | %     | 4.28     |
| Sodium                     | %     | 0.43     |
| Potassium                  | %     | 0.65     |

FOS: fructo-oligosaccharides; EPA: eicosapentaenoic acid; DHA: docosahexaenoic acid.

Patient Number \_\_\_\_\_

MONITORING DIARY FOR THE PATIENT WITH ACUTE DIARRHEA

SIGNALMENT

|        |  |
|--------|--|
| Name   |  |
| Breed  |  |
| Weight |  |
| Sex    |  |

Date: \_\_\_\_/\_\_\_\_/\_\_\_\_

Owner: \_\_\_\_\_

BRIEF MEDICAL HISTORY

How many days has the dog had diarrhea? \_\_\_\_\_

Is there blood in the stool? \_\_\_\_\_

Have you administered antibiotics in the last 30 days? \_\_\_\_\_

Have you administered anti-inflammatory or corticosteroids in the last 15 days? \_\_\_\_\_

Patient Number \_\_\_\_\_

FECAL SCORING CHART For Use On-Plan Veterinary Clinics

Among these images, choose the one that is closest to the consistency of your dog's feces

|   |  |                                     |
|---|--|-------------------------------------|
| 1 |  | Hard, dry, round fecal pellet       |
| 2 |  | Hard, dry, irregular fecal pellet   |
| 3 |  | Soft, moist, irregular fecal pellet |
| 4 |  | Soft, moist, irregular fecal pellet |
| 5 |  | Soft, moist, irregular fecal pellet |
| 6 |  | Soft, moist, irregular fecal pellet |
| 7 |  | Soft, moist, irregular fecal pellet |

Indicate with a cross the degree of alteration for each parameter

@ = normal; 1 = mild change; 2 = moderate change; 3 = severe change

| PARAMETER         | DAY 1 | DAY 2 | DAY 3 | DAY 4 | DAY 5 | DAY 6 |
|-------------------|-------|-------|-------|-------|-------|-------|
| General Activity  | 1 2 3 | 1 2 3 | 1 2 3 | 1 2 3 | 1 2 3 | 1 2 3 |
| Appetite          | 1 2 3 | 1 2 3 | 1 2 3 | 1 2 3 | 1 2 3 | 1 2 3 |
| Vomiting          | 1 2 3 | 1 2 3 | 1 2 3 | 1 2 3 | 1 2 3 | 1 2 3 |
| Stool Consistency | 1 2 3 | 1 2 3 | 1 2 3 | 1 2 3 | 1 2 3 | 1 2 3 |
| Stool Frequency   | 1 2 3 | 1 2 3 | 1 2 3 | 1 2 3 | 1 2 3 | 1 2 3 |

Supplementary Figure S1. Daily diary to fill at home by the owner: first page (a) and second page (b).
